# Supplementary material for: Temperature dependence of mosquitoes: Comparing mechanistic and machine learning approaches
Source: PubMed Central journal article supplement (PMC11460681; doi:10.1371/journal.pntd.0012488), 2024-09-16
Supplement: pntd.0012488.s001.pdf [file pntd.0012488.s001.pdf]

**Supplementary text 1: Temperature dependence of mosquitoes: comparing mechanistic and machine learning approaches**

Tejas S. Athni<sup>1,2</sup>, Marissa L. Childs<sup>3,4</sup>, Caroline K. Glidden<sup>2,5</sup>, Erin A. Mordecai<sup>2</sup>

**Table A. Filtered number of occurrences by species after each data cleaning step.**

| Species                                      | <i>Ae. aegypti</i> | <i>Ae. albopictus</i> | <i>An. gambiae</i> | <i>An. stephensi</i> | <i>Cx. pipiens</i> | <i>Cx. quinquefasciatus</i> | <i>Cx. tarsalis</i> |
|----------------------------------------------|--------------------|-----------------------|--------------------|----------------------|--------------------|-----------------------------|---------------------|
| <b>Raw Occurrences</b>                       | 37,115             | 39,488                | 13,650             | 1,232                | 98,276             | 30,978                      | 44,496              |
| <b>Known Basis of Record</b>                 | 36,981             | 39,449                | 13,650             | 1,196                | 98,248             | 30,964                      | 44,487              |
| <b>Records Within 2000-2019 Range</b>        | 30,956             | 34,399                | 10,116             | 540                  | 60,078             | 27,823                      | 34,361              |
| <b>Coordinate Uncertainty Reported</b>       | 30,908             | 34,122                | 10,116             | 540                  | 59,661             | 27,744                      | 34,358              |
| <b>Coordinate Uncertainty Decimal Filter</b> | 30,767             | 34,047                | 10,114             | 540                  | 59,661             | 27,738                      | 34,358              |
| <b>Within Landmass</b>                       | 30,651             | 33,885                | 10,109             | 535                  | 59,629             | 27,640                      | 35,358              |
| <b>Within Activity Season</b>                | 30,651             | 29,750                | 10,054             | 535                  | 59,429             | 27,640                      | 35,348              |
| <b>Complete Predictors</b>                   | 30,598             | 29,714                | 10,052             | 534                  | 59,415             | 27,560                      | 31,969              |
| <b>Unique Cell Centroids</b>                 | 9,299              | 8,688                 | 903                | 358                  | 1,949              | 2,670                       | 909                 |

**Table B. Environmental covariates and respective data sources, accessed from Google Earth Engine.**

| Covariate                                                       | Acronym      | Source                                | Units                       | Spatial Resolution <sup>†,*</sup> | Temporal Resolution <sup>^</sup> |
|-----------------------------------------------------------------|--------------|---------------------------------------|-----------------------------|-----------------------------------|----------------------------------|
| Cattle Density                                                  | CD           | Gridded Livestock of the World v3 [1] | Animals per 1 sq. kilometer | 9.25 km <sup>#</sup>              | Single year (2010)               |
| Enhanced Vegetation Index Mean                                  | EVIM         | NASA MOD13A2 [2]                      | EVI                         | 1 km                              | 16 days                          |
| Enhanced Vegetation Index Standard Deviation                    | EVISD        | NASA MOD13A2 [2]                      | EVI                         | 1 km                              | 16 days                          |
| Forest Cover                                                    | FC           | NASA MOD44B [3]                       | % of a pixel                | 250 m                             | Yearly                           |
| Human Population Density                                        | HPD          | GHS-POP [4]                           | Persons per 1 sq. kilometer | 1 km                              | Single year (2000, 2015)         |
| Precipitation of the Driest Quarter                             | PDQ          | ERA5 [5]                              | Millimeters                 | 27.83 km                          | Daily                            |
| Precipitation of the Wettest Quarter                            | PWQ          | ERA5 [5]                              | Millimeters                 | 27.83 km                          | Daily                            |
| Surface Water Seasonality                                       | SW           | JRC Global Surface Water [6]          | Number of months            | 30 m                              | Single year (2014-15)            |
| Temperature Mean in Photoperiod Activity Season                 | Photo ASTM   | ERA5 [5]                              | °C                          | 27.83 km                          | Daily                            |
| Temperature Standard Deviation in Photoperiod Activity Season   | Photo ASTSD  | ERA5 [5]                              | °C                          | 27.83 km                          | Daily                            |
| Temperature Mean in Precipitation Activity Season               | Precip ASTM  | ERA5 [5]                              | °C                          | 27.83 km                          | Daily                            |
| Temperature Standard Deviation in Precipitation Activity Season | Precip ASTSD | ERA5 [5]                              | °C                          | 27.83 km                          | Daily                            |
| Temperature Mean Year-Round                                     | TAM          | ERA5 [5]                              | °C                          | 27.83 km                          | Daily                            |
| Temperature Standard Deviation Year-Round                       | TASD         | ERA5 [5]                              | °C                          | 27.83 km                          | Daily                            |
| Wind Speed                                                      | WS           | TerraClimate [7]                      | Meters per second           | 4.64 km                           | Monthly                          |

|                           |     |          |   |          |       |
|---------------------------|-----|----------|---|----------|-------|
| Average relative humidity | ARH | ERA5 [5] | % | 27.83 km | Daily |
|---------------------------|-----|----------|---|----------|-------|

† The following conversions are used to acquire spatial resolution in kilometers:

1 minute of arc  $\approx$  0.0166667 degrees,

1 degree  $\approx$  111 kilometers

\* All rasters are resampled to 1 km x 1 km grid cells before use as a predictor in the machine learning model

^ All rasters are averaged over the 2000-2019 study period, if adequate temporal data is available

# Sourced as 5 arcmin

**Table C. Model performance. Median and range of AUC (min-max) across bootstrapping iterations for both in-sample and out-of-sample performance.**

| <b>Species</b>              | <b>In-sample AUC</b>   | <b>Out-sample AUC</b>  |
|-----------------------------|------------------------|------------------------|
| <i>Ae. aegypti</i>          | 0.999 (0.9959-0.9999)  | 0.9887 (0.9864-0.9918) |
| <i>Ae. albopictus</i>       | 0.9982 (0.9963-0.9998) | 0.984 (0.9815-0.9861)  |
| <i>An. gambiae</i>          | 0.998 (0.9864-0.9999)  | 0.9366 (0.9149-0.9613) |
| <i>An. stephensi</i>        | 1 (0.9993-1)           | 0.9411 (0.9066-0.9721) |
| <i>Cx. pipiens</i>          | 0.9979 (0.9887-0.9999) | 0.9347 (0.9184-0.9461) |
| <i>Cx. quinquefasciatus</i> | 0.9996 (0.9981-0.9999) | 0.9882 (0.9839-0.9915) |
| <i>Cx. tarsalis</i>         | 0.9967 (0.9881-0.9992) | 0.9583 (0.9504-0.9743) |

**Table D. Thermal minima, optima, and maxima with rank ordering across species for the mechanistic trait based model (M(T)) versus the species distribution model (partial dependence plots (PDPs)).**

| Species                       | Model | Thermal Minima (Rank) | Thermal Optima (Rank) | Thermal Maxima (Rank) # |
|-------------------------------|-------|-----------------------|-----------------------|-------------------------|
| <i>Aedes aegypti</i>          | M(T)  | 14.9 °C (3)           | 27.4 °C (1)           | 34.4 °C (3)             |
|                               | PDP   | 9.8 °C (4)            | 25.6°C (3)            | --                      |
| <i>Aedes albopictus</i>       | M(T)  | 13.7 °C (4)           | 25.5 °C (2)           | 31.3 °C (7)             |
|                               | PDP   | 8.8 °C (5)            | 23 °C (4)             | --                      |
| <i>Anopheles gambiae</i>      | M(T)  | 19.6 °C (1)           | 24.7 °C (3)           | 32.2 °C (4)             |
|                               | PDP   | 18.5 °C (1)           | 26.5 °C (2)           | --                      |
| <i>Anopheles stephensi</i>    | M(T)  | 15.4 °C (2)           | 24.1 °C (4)           | 37.1 °C (1)             |
|                               | PDP   | 15.5 °C (2)           | 26.9 °C (1)           | --                      |
| <i>Culex pipiens</i>          | M(T)  | 9.5 °C (6)            | 22.4 °C (7)           | 34.8 °C (2)             |
|                               | PDP   | 5.5 °C (7)            | 13 °C (6)             | --                      |
| <i>Culex quinquefasciatus</i> | M(T)  | 13.6 °C (5)           | 23.6 °C (5)           | 31.7 °C (6)             |
|                               | PDP   | 11.1 °C (3)           | 22°C (5)              | --                      |
| <i>Culex tarsalis</i>         | M(T)  | 6.9 °C (7)            | 23 °C (6)             | 31.9 °C (5)             |
|                               | PDP   | 7.2 °C (6)            | 11.5 °C (7)           | --                      |

# Thermal maxima were not discernible from the partial dependence plots, and are thus not reported.

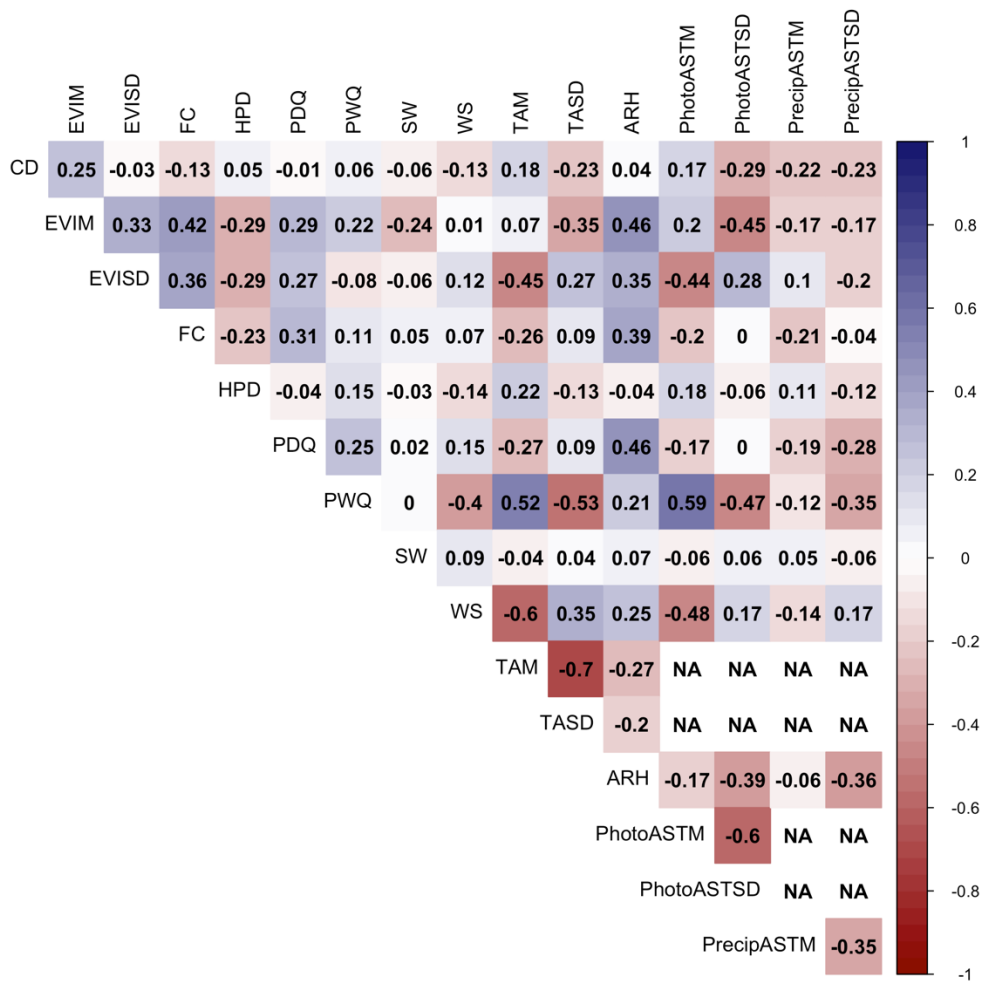

**Figure A. Pairwise correlation plot of environmental predictors used in the model.** A pairwise correlation analysis was run for each set of two covariates, and any variables that had a correlation that exceeded the  $R < |0.8|$  threshold were reassessed and modified, or dropped from the analysis entirely. CD is cattle density; EVIM is enhanced vegetation index mean; EVISD is enhanced vegetation index standard deviation; FC is forest cover percentage; HPD is human population density; PDQ is precipitation of the driest quarter; PhotoASTM is photoperiod activity season temperature annual mean; PhotoASTSD is photoperiod activity season temperature standard deviation; PrecipASTM is precipitation activity season temperature annual mean; PrecipASTSD is precipitation activity season temperature standard deviation; PWQ is precipitation of the wettest quarter; SW is surface water seasonality; TAM is year-round temperature annual mean; TASD is year-round temperature annual standard deviation; ARH is average relative humidity; and WS is wind speed. There are NAs among temperature variables as there was only one set included in each model (e.g., the *Ae. albopictus* model included PhotoASTM and PhotoASTD but not TAM, TASD, PrecipASTM, or PrecipASTD).

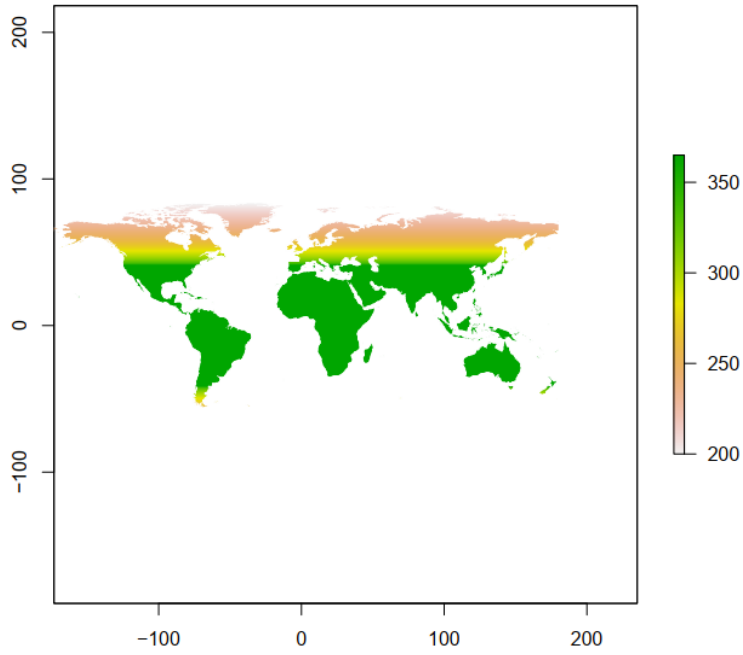

**Figure B. Photoperiod activity season.** Map of the world shaded in with the length of the photoperiod activity season.

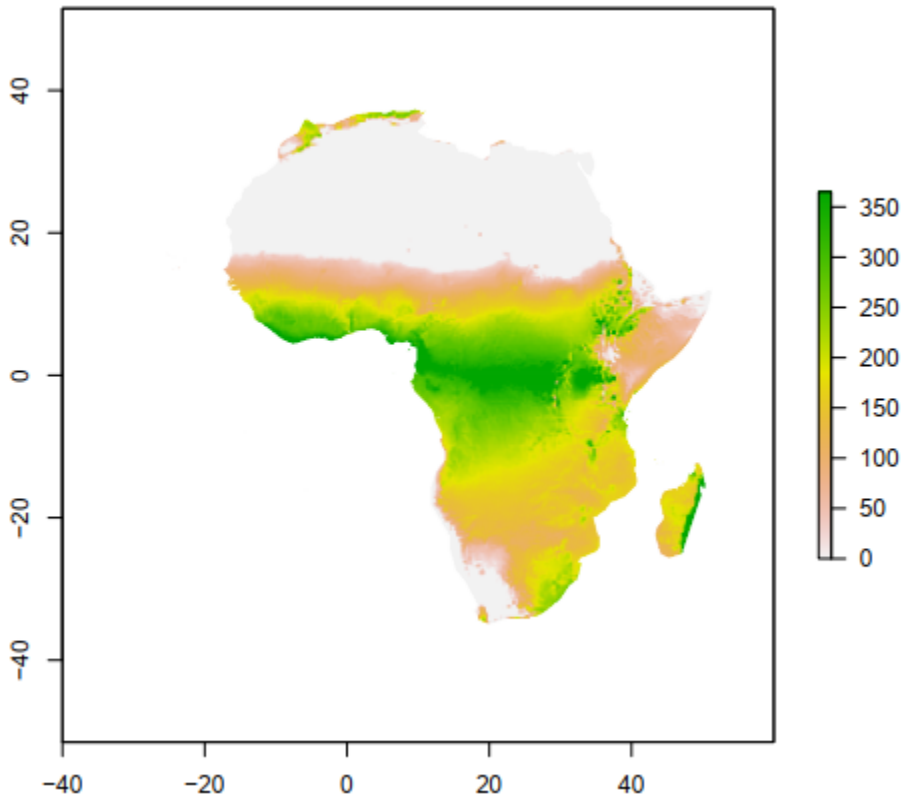

**Figure C. Precipitation activity season.** Map of Africa shaded in with the length of the precipitation activity season in days. Source for precipitation data is described in Table B.



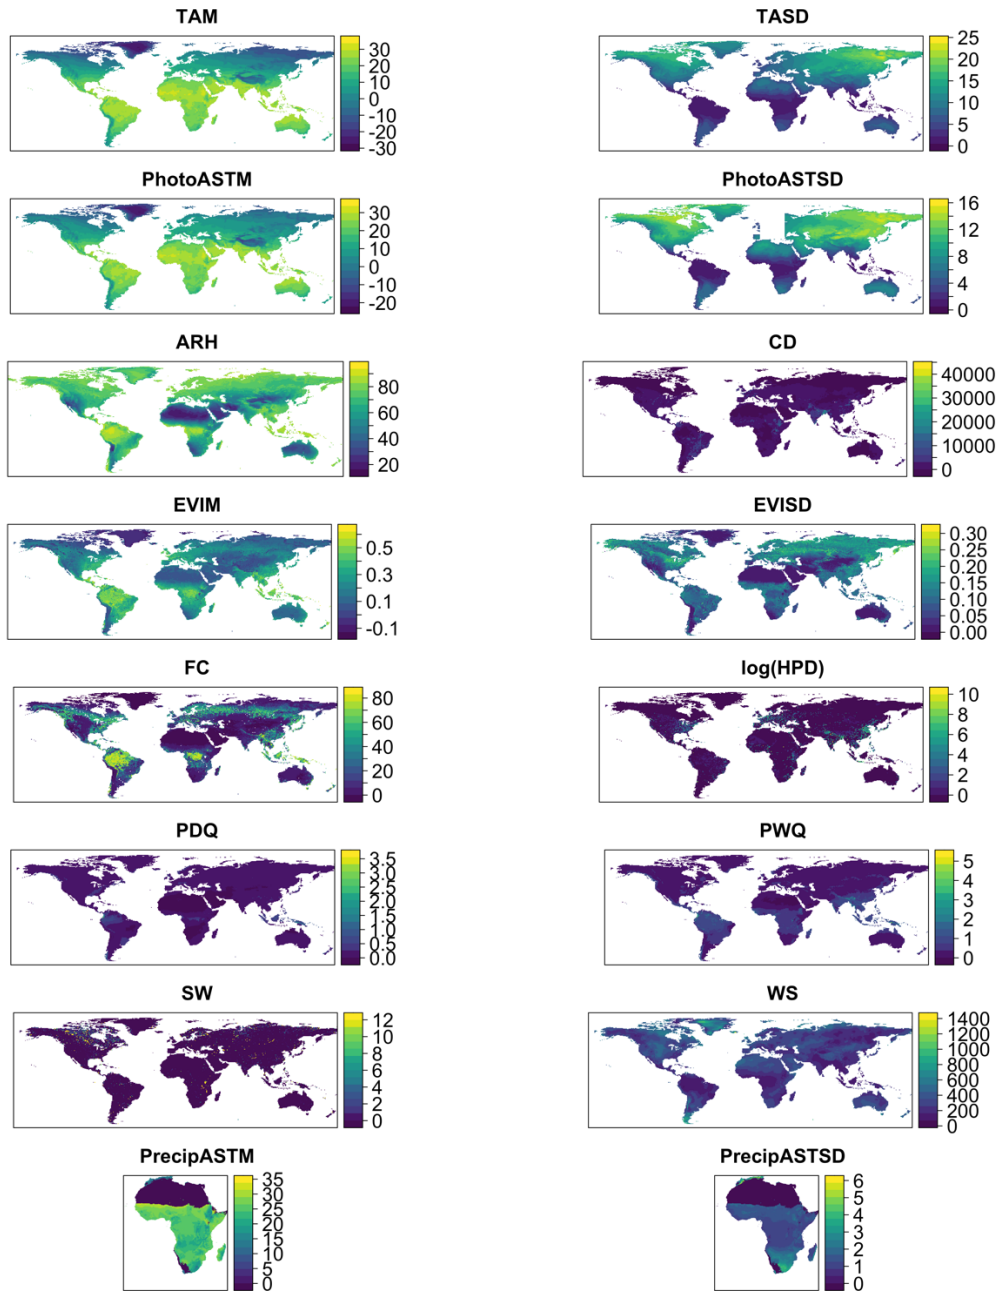

**Figure D. Raster plots of all environmental covariates used in the model.** Geographic and spatial distribution of every covariate used in the model, including cattle density (CD), enhanced vegetation index mean (EVIM), enhanced vegetation index standard deviation (EVISD), forest cover percentage (FC), human population density (HPD), precipitation of the driest quarter (PDQ), photoperiod activity season temperature mean (PhotoASTM), photoperiod activity season temperature standard deviation (PhotoASTSD), precipitation activity season temperature mean (PrecipASTM), precipitation activity season temperature standard deviation (PrecipASTSD), precipitation of the wettest quarter (PWQ), surface water seasonality (SW), year-round temperature annual mean (TAM), year-round temperature annual standard deviation (TASD), average relative humidity (ARH), and wind speed (WS). PrecipASTM and PrecipASTSD are only depicted over Africa as this is the region the data was used (*An. gambiae*'s data points are restricted to Africa).

## *Aedes aegypti*

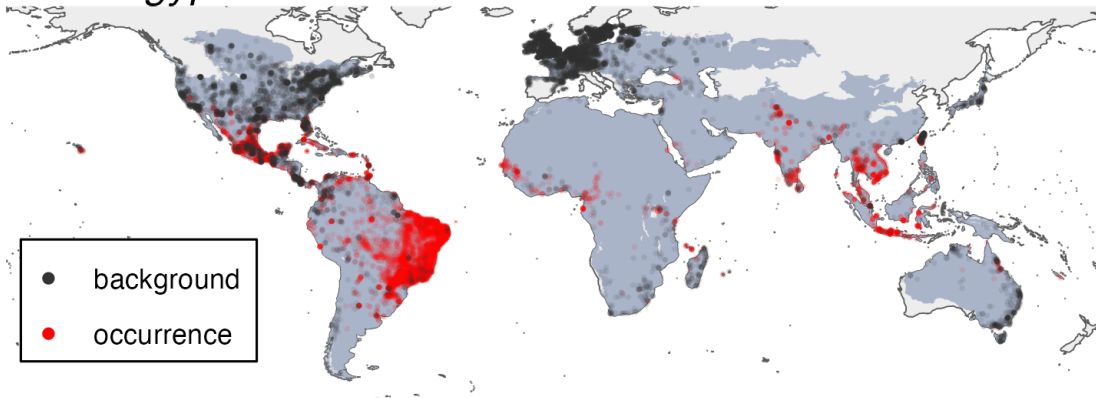

### **Figure E. Species occurrence and pseudo-absence background map for *Aedes aegypti*.**

Species occurrence centroids (red) and associated pseudo-absence background centroids (black) are plotted, superimposed on the respective set of ecoregions in which their buffered occurrence centroids fall and adjacent ecoregions (gray). The background shapefiles are based on from <https://ecoregions.appspot.com/> and coastlines are from <https://ec.europa.eu/eurostat/web/gisco>.

## *Aedes albopictus*

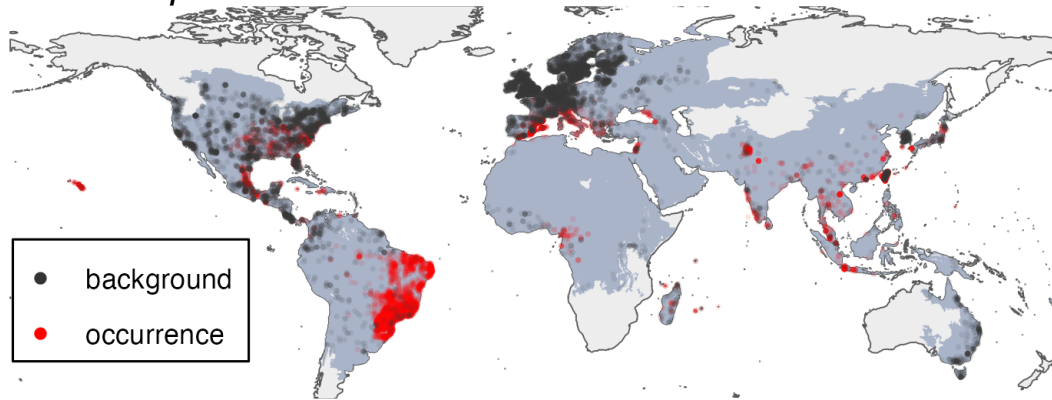

**Figure F. Species occurrence and pseudo-absence background maps for *Aedes albopictus*.** Species occurrence centroids (red) and associated pseudo-absence background centroids (black) are plotted, superimposed on the respective set of ecoregions in which their buffered occurrence centroids fall and adjacent ecoregions (gray). The background shapefiles are based on from <https://ecoregions.appspot.com/> and coastlines are from <https://ec.europa.eu/eurostat/web/gisco>.

## *Anopheles stephensi*

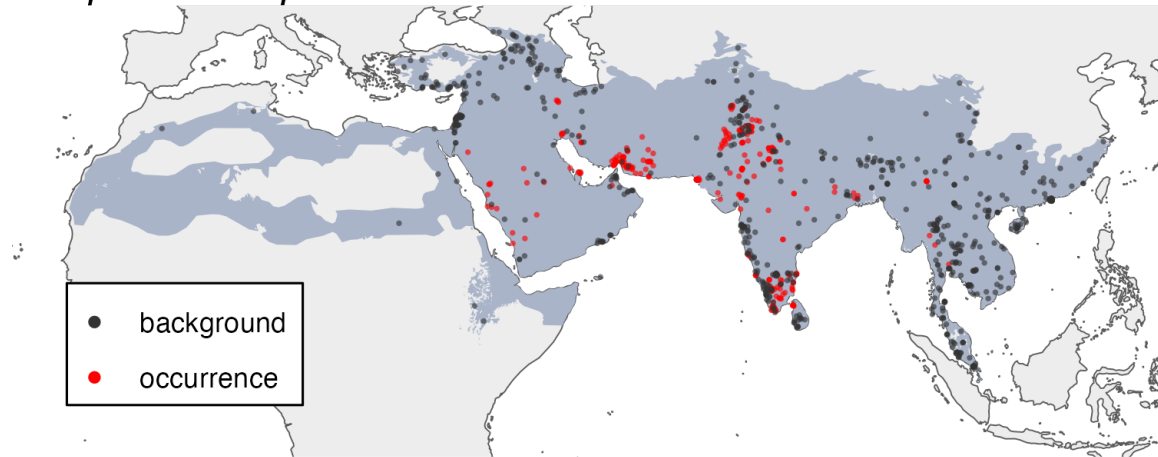

**Figure G. Species occurrence and pseudo-absence background maps for *Anopheles stephensi*.** Species occurrence centroids (red) and associated pseudo-absence background centroids (black) are plotted, superimposed on the respective set of ecoregions in which their buffered occurrence centroids fall and adjacent ecoregions (gray). The background shapefiles are based on from <https://ecoregions.appspot.com/> and coastlines are from <https://ec.europa.eu/eurostat/web/gisco>.

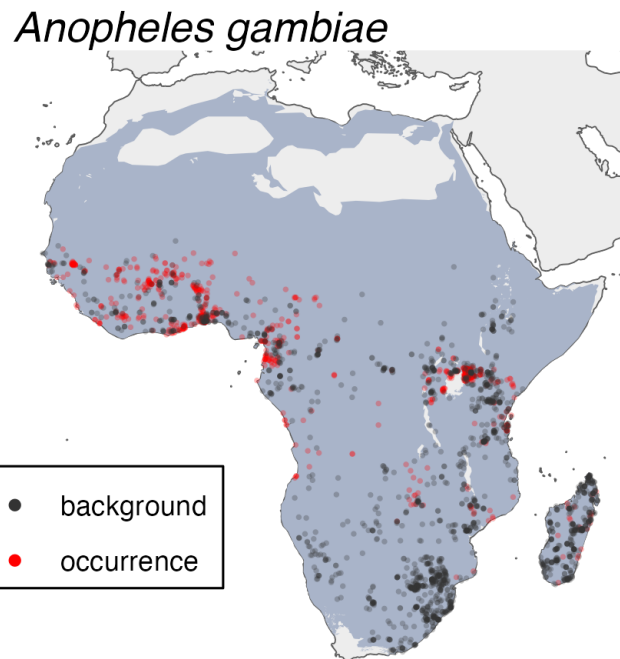

**Figure H. Species occurrence and pseudo-absence background maps for *Anopheles gambiae*.** Species occurrence centroids (red) and associated pseudo-absence background centroids (black) are plotted, superimposed on the respective set of ecoregions in which their buffered occurrence centroids fall and adjacent ecoregions (gray). The background shapefiles are based on from <https://ecoregions.appspot.com/> and coastlines are from <https://ec.europa.eu/eurostat/web/gisco>.

## *Culex tarsalis*

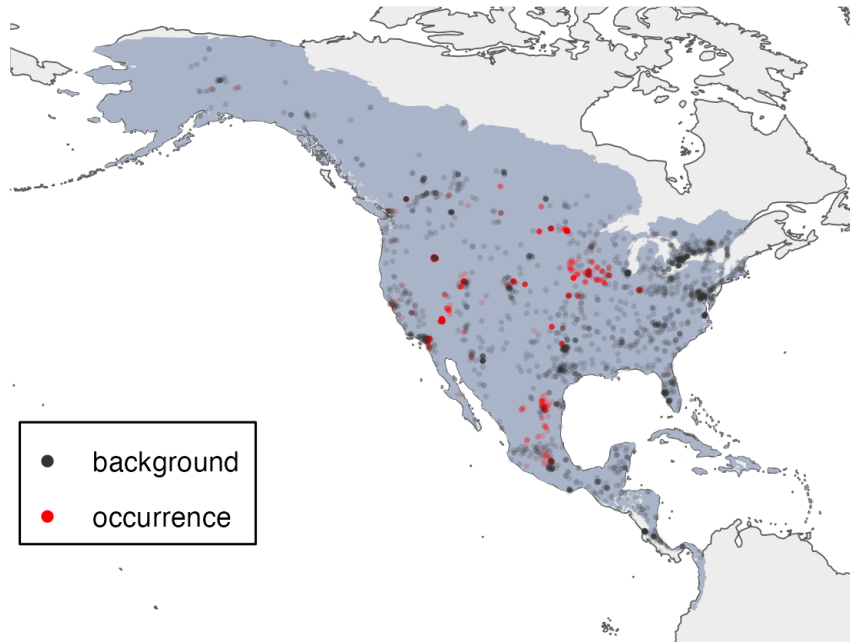

**Figure I. Species occurrence and pseudo-absence background maps for *Culex tarsalis*.** Species occurrence centroids (red) and associated pseudo-absence background centroids (black) are plotted, superimposed on the respective set of ecoregions in which their buffered occurrence centroids fall and adjacent ecoregions (gray). The background shapefiles are based on from <https://ecoregions.appspot.com/> and coastlines are from <https://ec.europa.eu/eurostat/web/gisco>.

## *Culex quinquefasciatus*

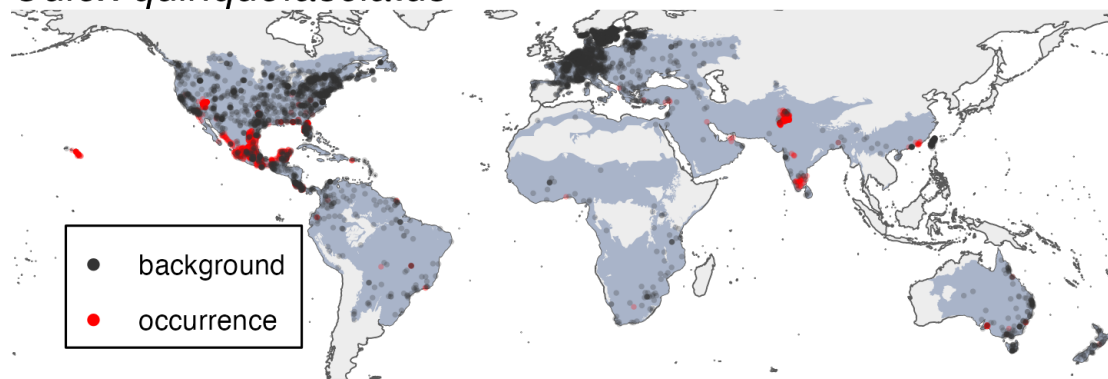

**Figure J. Species occurrence and pseudo-absence background maps for *Culex quinquefasciatus*.** Species occurrence centroids (red) and associated pseudo-absence background centroids (black) are plotted, superimposed on the respective set of ecoregions in which their buffered occurrence centroids fall and adjacent ecoregions (gray). The background shapefiles are based on from <https://ecoregions.appspot.com/> and coastlines are from <https://ec.europa.eu/eurostat/web/gisco>.

## *Culex pipiens*

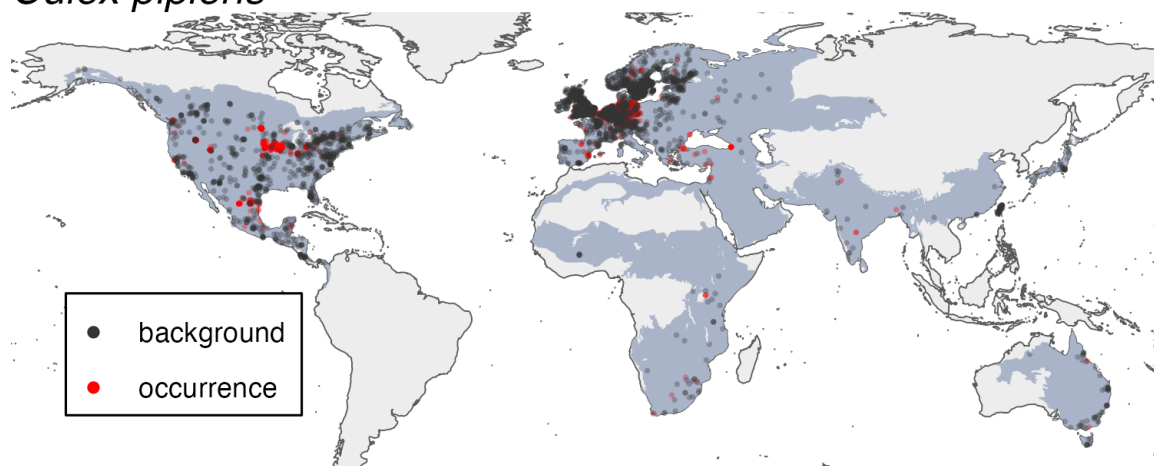

**Figure K. Species occurrence and pseudo-absence background maps for *Culex pipiens*.** Species occurrence centroids (red) and associated pseudo-absence background centroids (black) are plotted, superimposed on the respective set of ecoregions in which their buffered occurrence centroids fall and adjacent ecoregions (gray). The background shapefiles are based on from <https://ecoregions.appspot.com/> and coastlines are from <https://ec.europa.eu/eurostat/web/gisco>.



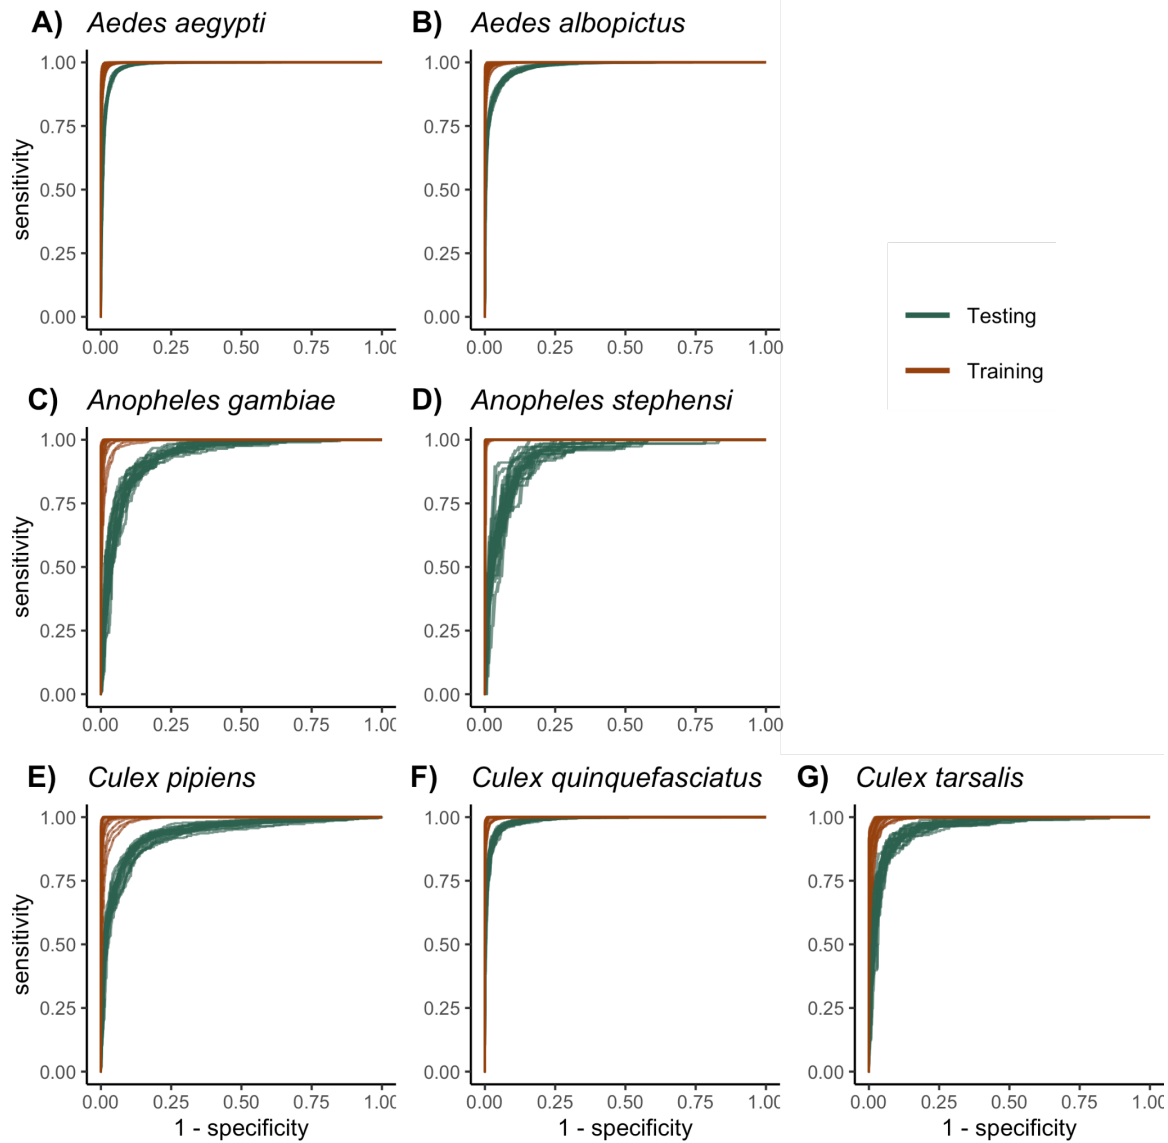

**Figure L. XGBoost models accurately predicted mosquito occurrence in- and out-of-sample.** Receiver operating characteristic (ROC) curves and area under the curve (AUC) values for assessment of model discrimination are depicted, where 1 represents perfect discrimination of presence and absence and 0.5 represents discrimination no better than chance. Curves depict the training set (red) and the evaluation set (blue).

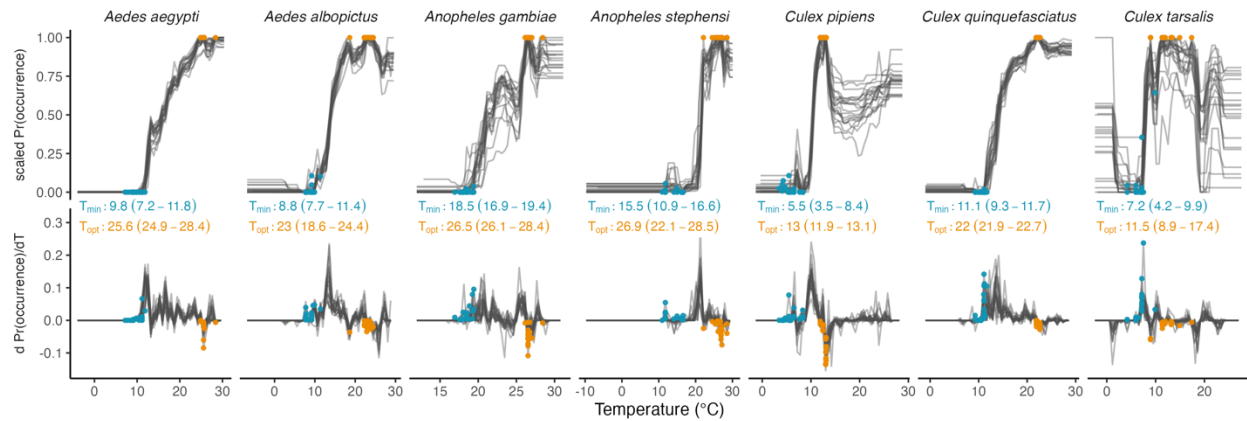

**Figure M. Thermal minima and thermal optima derived from the PDPs.** Thermal minima were identified as the temperature at which the partial dependence plot began increasing, which we operationalized as the first time the empirical derivative was positive and stayed positive for the next step in temperature as well (Fig. 1c). Thermal optima were identified as the point where the empirical derivative was zero and the partial dependence plot was at its maximum (Fig. 1c). We did not identify thermal maxima, as few species had partial dependence plots that clearly declined after the thermal optima and then reached a lower plateau that was within the range of observed temperatures. Central thermal minima and optima values are medians across the 20 model iterations, and parentheses indicate the full range of values over the model iterations.

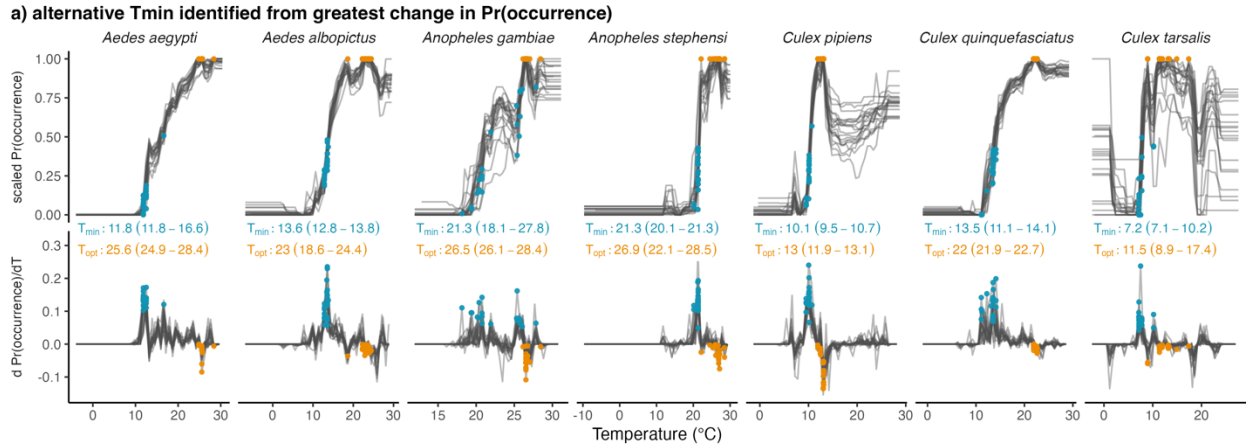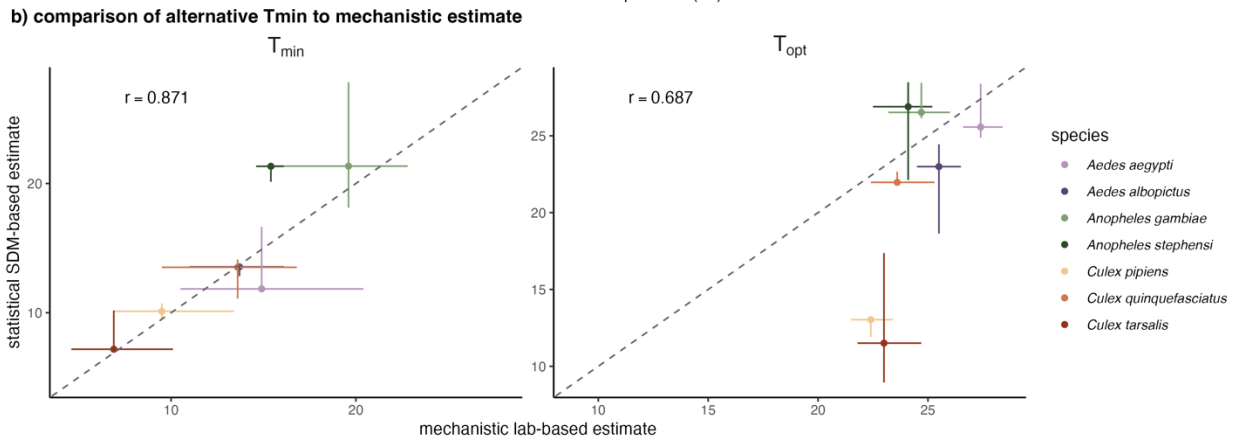

**Figure N. Comparison between statistical and mechanistic under alternative definition of  $T_{min}$ .** Lower thermal limits are instead identified as the temperature with the largest empirical derivative in the PDP. Panel a is as in Fig M. Panel b is as in Figure 4.

## *Aedes aegypti*

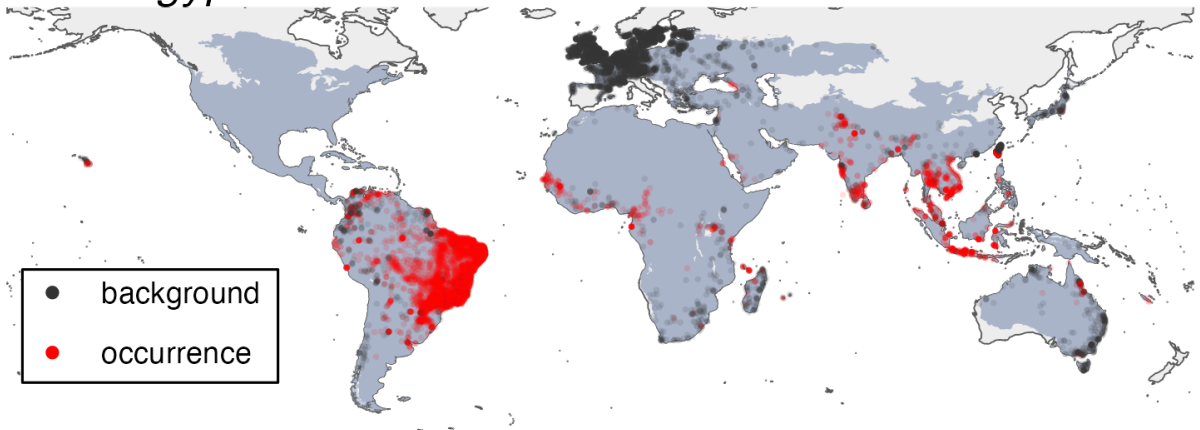

**Figure O. Species occurrence and pseudo-absence background map for *Aedes aegypti* without North America.** Species occurrence centroids (red) and associated pseudo-absence background centroids (black) are plotted, superimposed on the respective set of ecoregions in which their buffered occurrence centroids fall and adjacent ecoregions (gray). The background shapefiles are based on from <https://ecoregions.appspot.com/> and coastlines are from <https://ec.europa.eu/eurostat/web/gisco>.

## *Aedes albopictus*

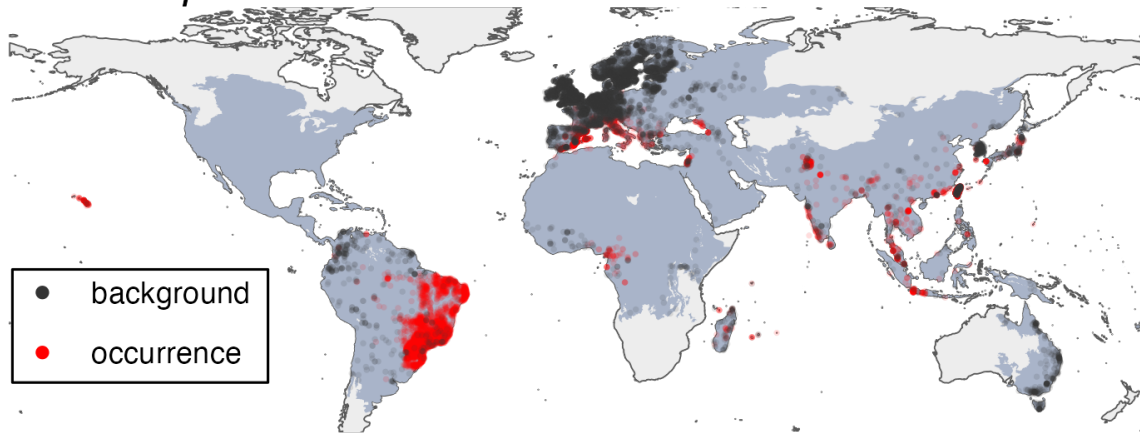

**Figure P. Species occurrence and pseudo-absence background map for *Aedes albopictus* without North America.** Species occurrence centroids (red) and associated pseudo-absence background centroids (black) are plotted, superimposed on the respective set of ecoregions in which their buffered occurrence centroids fall and adjacent ecoregions (gray). The background shapefiles are based on from <https://ecoregions.appspot.com/> and coastlines are from <https://ec.europa.eu/eurostat/web/gisco>.

## *Aedes aegypti*

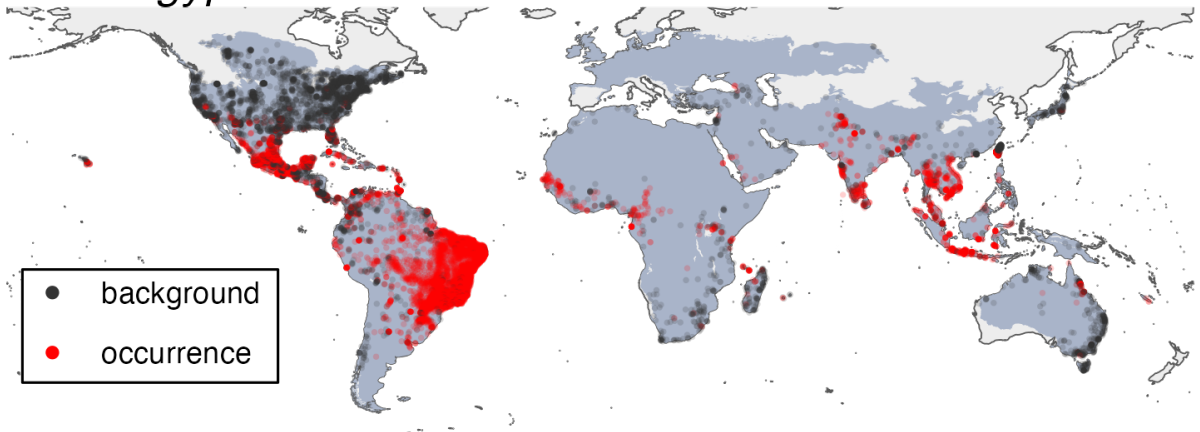

**Figure Q. Species occurrence and pseudo-absence background map for *Aedes aegypti* without Europe.** Species occurrence centroids (red) and associated pseudo-absence background centroids (black) are plotted, superimposed on the respective set of ecoregions in which their buffered occurrence centroids fall and adjacent ecoregions (gray). The background shapefiles are based on from <https://ecoregions.appspot.com/> and coastlines are from <https://ec.europa.eu/eurostat/web/gisco>.

## *Aedes albopictus*

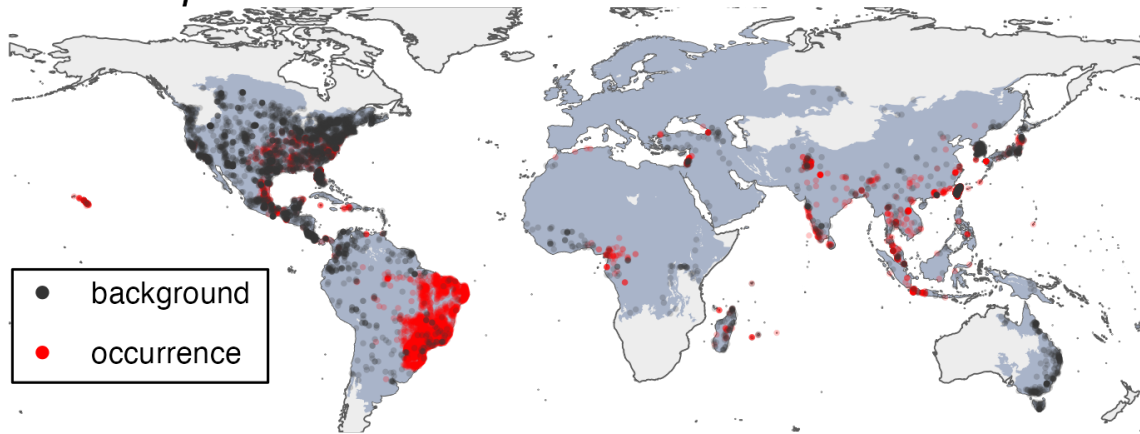

**Figure R. Species occurrence and pseudo-absence background map for *Aedes albopictus* without Europe.** Species occurrence centroids (red) and associated pseudo-absence background centroids (black) are plotted, superimposed on the respective set of ecoregions in which their buffered occurrence centroids fall and adjacent ecoregions (gray). The background shapefiles are based on from <https://ecoregions.appspot.com/> and coastlines are from <https://ec.europa.eu/eurostat/web/gisco>.

**a) Critical thermal values with different geographic samples**

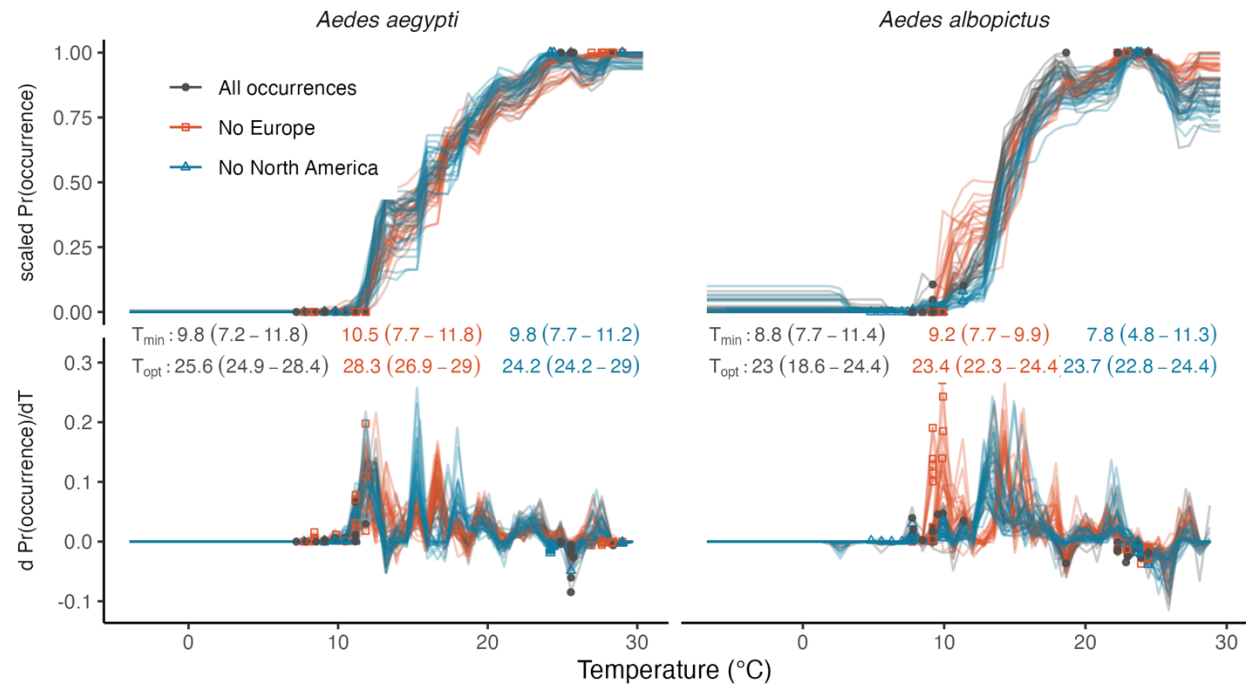

**b) Comparison of different geographic samples to mechanistic thermal values**

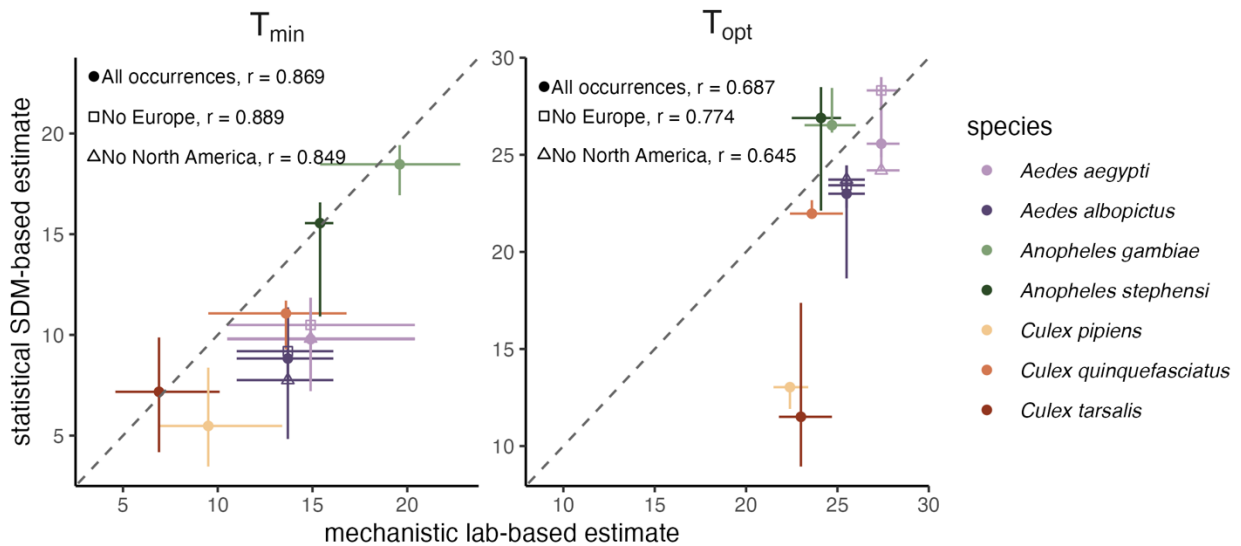

**Figure S. Critical thermal minima and optima identified with different geographic samples.**

a) Scaled probability of occurrence (top row) and the derivative of probability of occurrence (bottom row) from partial dependence plots for the full sample (grey lines and circles), without Europe (red lines and squares) and without North America (blue lines and triangles). Text labels between panels indicates the median, minimum, and maximum for the thermal minima ( $T_{min}$ ) and thermal optima ( $T_{opt}$ ) across the 20 model iterations. b) As in Fig. 4, but showing  $T_{min}$  (left panel) and  $T_{opt}$  (right panel) from the three different geographic samples (all occurrences [circles], without Europe [squares], and without North America [triangles]). Each panel displays the Pearson's correlation for the different geographic samples.
